# Supplementary material for: Eugenol Induces Apoptosis in Tongue Squamous Carcinoma Cells by Mediating the Expression of Bcl-2 Family
Source: MDPI journal article supplement (doi:10.3390/life13010022), 2022-12-21
Supplement: s1 [file s1]

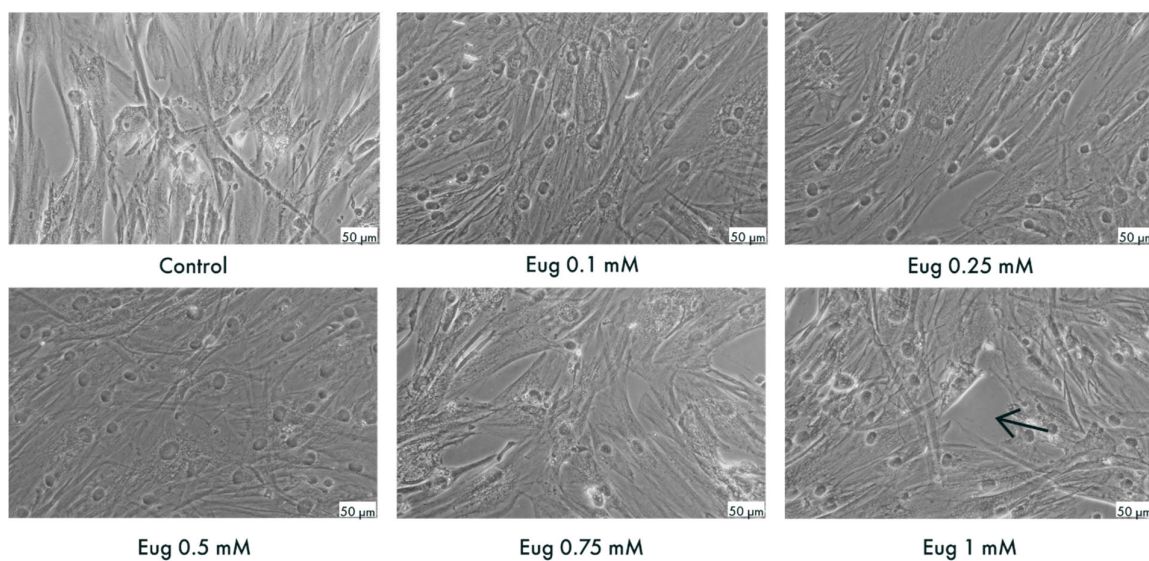

**Figure S1.** Bright field illumination images of the morphology of HGF cells after 72h treatment with eugenol 0.1-1 mM. Detachment from the plate and rounded cells can be noticed at 1 mM, marked with arrow. The scale bar indicates 50  $\mu$ m.

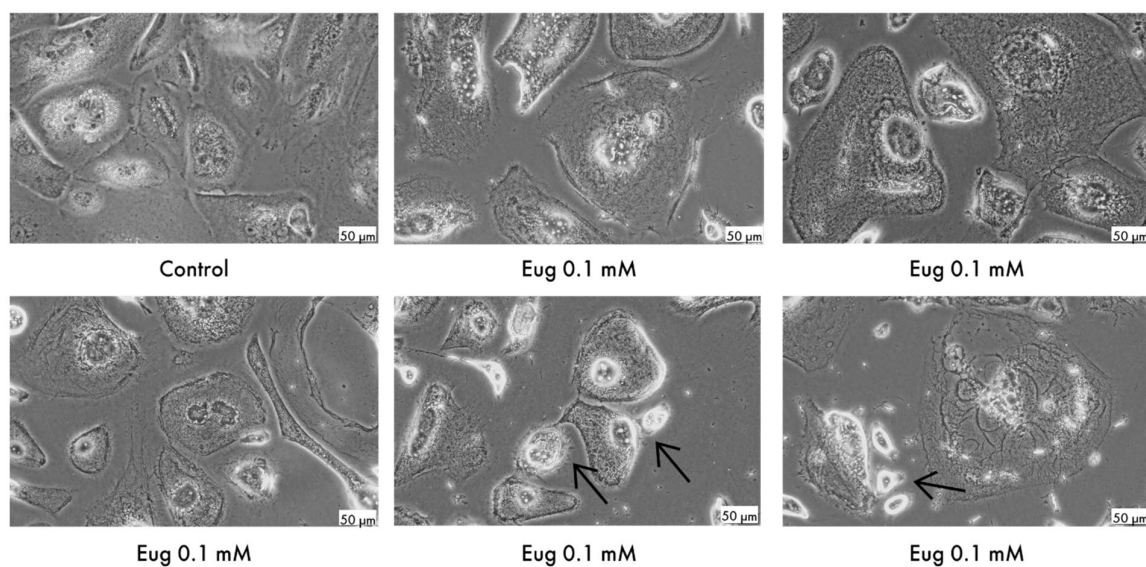

**Figure S2.** Bright field illumination images of the morphology of **SCC-4** cells after 72h treatment with eugenol 0.1-1 mM. Rounded and shrunk cells which have lost contact with the neighbouring cells can be seen, marked with arrows. The scale bar indicates 50  $\mu$ m.
